# Supplementary material for: Behavioural diversity of bonobo prey preference as a potential cultural trait
Source: eLife. 2020 Sep 1;9:e59191. doi: 10.7554/eLife.59191 (PMC7462605; doi:10.7554/eLife.59191)
Supplement: Figure 1—source data 1. [file elife-59191-fig1-data1.csv]

Group	utm.long	utm.lat	Species
Ekalakala	720834	47541	Anomalure
Ekalakala	722273	47138	Anomalure
Ekalakala	719571	43283	Anomalure
Ekalakala	718851	43548	Anomalure
Ekalakala	721661	47966	Anomalure
Ekalakala	719548	42737	Anomalure
Ekalakala	721558	46479	Anomalure
Ekalakala	721426	47551	Anomalure
Ekalakala	719840	43470	Anomalure
Ekalakala	719687	43598	Anomalure
Ekalakala	719936	44026	Anomalure
Ekalakala	720167	42588	Anomalure
Ekalakala	717550	42489	Anomalure
Ekalakala	720603	47081	Anomalure
Ekalakala	720049	44613	Anomalure
Ekalakala	719490	43235	Anomalure
Ekalakala	717490	42270	Anomalure
Ekalakala	719367	45984	Anomalure
Ekalakala	720243	43177	Anomalure
Ekalakala	721349	45834	Anomalure
Ekalakala	722417	48048	Anomalure
Ekalakala	722563	47127	Anomalure
Ekalakala	720243	47063	Anomalure
Ekalakala	720564	47161	Anomalure
Ekalakala	722257	48575	Anomalure
Ekalakala	719169	43034	Anomalure
Ekalakala	723860	45943	Anomalure
Ekalakala	720632	45847	Anomalure
Ekalakala	723241	48214	Anomalure
Ekalakala	722625	47842	Anomalure
Ekalakala	719769	46303	Anomalure
Ekalakala	719463	42898	Duiker
Ekalakala	717519	42434	Squirrel
Kokoalongo	720153	44373	Anomalure
Kokoalongo	721082	45978	Anomalure
Kokoalongo	722386	45476	Anomalure
Kokoalongo	721651	46211	Duiker
Kokoalongo	723575	40737	Duiker
Kokoalongo	720806	43006	Duiker
Kokoalongo	720897	43173	Duiker
Kokoalongo	721778	42797	Duiker
Kokoalongo	719051	43495	Duiker
Kokoalongo	719050	42570	Duiker
Kokoalongo	720743	43127	Duiker
Kokoalongo	721223	44855	Duiker
Kokoalongo	722483	45366	Duiker
Kokoalongo	721888	43756	Duiker
Kokoalongo	722258	43367	Squirrel
Kokoalongo	720477	43140	Squirrel
Kokoalongo	722651	41424	Squirrel
Kokoalongo	723730	43208	Squirrel
Kokoalongo	721976	42733	Squirrel
Kokoalongo	724554	44238	Squirrel
Kokoalongo	722313	42489	Squirrel
Kokoalongo	722225	42629	Squirrel
Kokoalongo	721379	47535	Squirrel
Kokoalongo	721909	46516	Squirrel
Kokoalongo	724703	48184	Squirrel
Kokoalongo	720080	42886	Squirrel
