# Supplementary material for: Behavioural diversity of bonobo prey preference as a potential cultural trait
Source: eLife. 2020 Sep 1;9:e59191. doi: 10.7554/eLife.59191 (PMC7462605; doi:10.7554/eLife.59191)
Supplement: Figure 1—source data 2. [file elife-59191-fig1-data2.csv]

Group	Category	Estimate	SE	CI-lower	CI-upper
Ekalakala	Anomalure	0.974747429	0.022559834	0.887218516	0.997878094
Kokoalongo	Anomalure	0.043550981	0.041089698	0.00272641	0.206113198
Ekalakala	Duiker	0.010534181	0.011984327	0.000249966	0.079455082
Kokoalongo	Duiker	0.402051703	0.119944771	0.192164627	0.640441605
Ekalakala	Squirrel	0.009088507	0.0102081	0.000275761	0.065454483
Kokoalongo	Squirrel	0.536804691	0.120793575	0.301761116	0.761261416
