# Supplementary material for: Behavioural diversity of bonobo prey preference as a potential cultural trait
Source: eLife. 2020 Sep 1;9:e59191. doi: 10.7554/eLife.59191 (PMC7462605; doi:10.7554/eLife.59191)
Supplement: Source data 1. [file elife-59191-data1.csv]

Supplementary File 3 - Behavioural diversity of bonobo prey preference as a potential cultural trait
Year	Group	Prey type	Area usage difference (z-transformed)	Average associations (z-transformed)	Male party size (z-transformed)	Female party size (z-transformed)	sine Date	cosine Date
2016	Ekalakala	Anomalure	0.510003478	1.122446512	-0.75279036	-1.019849731	0.781256568	-0.62421004
2016	Kokoalongo	Duiker	-0.898158835	-1.432878291	-0.183372011	-0.267710554	-0.506503538	-0.862237883
2016	Ekalakala	Anomalure	-0.786988126	0.954103977	0.386046338	0.108359034	-0.890664596	-0.454660948
2016	Ekalakala	Anomalure	0.435889672	1.004754778	-0.183372011	-0.267710554	-0.959685507	0.281076018
2016	Ekalakala	Anomalure	0.547060381	0.954103977	0.386046338	0.108359034	-0.918971488	0.394323983
2016	Ekalakala	Anomalure	-0.34230529	0.954103977	0.386046338	0.108359034	-0.847173337	0.531316606
2016	Ekalakala	Anomalure	0.102377546	1.237686408	-0.183372011	0.108359034	-0.670886518	0.741560031
2016	Kokoalongo	Squirrel	1.362312247	0.424450726	-0.75279036	-0.267710554	-0.658031254	0.752990616
2016	Ekalakala	Anomalure	-0.749931223	1.149741477	-0.183372011	-0.643780143	-0.548510502	0.836143666
2016	Ekalakala	Anomalure	-0.268191484	0.954103977	0.386046338	0.108359034	-0.267635505	0.963520231
2017	Ekalakala	Anomalure	0.176491352	0.952024792	-0.183372011	-0.643780143	0.998612602	0.052658057
2017	Kokoalongo	Duiker	-0.453475999	-0.926009354	0.955464687	-0.267710554	0.999999422	0.001075151
2017	Kokoalongo	Squirrel	-0.564646708	-0.425575582	0.386046338	-0.643780143	0.996395024	-0.084834878
2017	Ekalakala	Anomalure	0.398832769	1.332294534	-0.75279036	-0.643780143	0.99069231	-0.136120339
2017	Ekalakala	Anomalure	0.102377546	0.954103977	0.386046338	0.108359034	0.978988874	-0.203913671
2017	Kokoalongo	Squirrel	0.139434449	1.044249516	-0.75279036	-1.395919319	0.971395285	-0.237468316
2017	Kokoalongo	Squirrel	-0.490532902	0.695175401	-0.75279036	-0.643780143	0.96716673	-0.254142709
2017	Ekalakala	Anomalure	-0.935215738	1.317773473	-0.75279036	-0.643780143	0.935834897	-0.352438711
2017	Ekalakala	Anomalure	0.398832769	1.381680064	-0.75279036	0.108359034	0.750864253	-0.660456564
2017	Kokoalongo	Duiker	0.472946575	-0.18158039	0.386046338	0.484428622	0.499068603	-0.866562479
2017	Kokoalongo	Duiker	0.472946575	-0.729812901	-0.75279036	1.612637387	-0.147827133	-0.989013215
2017	Kokoalongo	Duiker	2.399905531	-1.203384919	2.094301385	3.116915741	-0.411053755	-0.911611107
2017	Ekalakala	Anomalure	0.435889672	0.954103977	0.386046338	0.108359034	-0.888701048	-0.458487129
2017	Kokoalongo	Duiker	-2.639833276	-1.357751888	4.37197478	3.492985329	-0.963807423	-0.266599421
2017	Ekalakala	Anomalure	0.398832769	1.234768217	-0.75279036	-0.267710554	-0.97985677	-0.199701553
2017	Kokoalongo	Duiker	-2.639833276	-1.231559877	-0.75279036	-0.643780143	-0.999930066	-0.011826391
2017	Ekalakala	Anomalure	0.435889672	1.237686408	-0.183372011	0.108359034	-0.960885426	0.276946202
2017	Kokoalongo	Anomalure	-1.861638313	-1.136230494	-0.75279036	0.484428622	-0.933541891	0.358468322
2017	Ekalakala	Anomalure	0.435889672	1.237686408	-0.183372011	0.108359034	-0.830797017	0.556575527
2017	Ekalakala	Anomalure	0.176491352	0.968174791	-0.183372011	-0.267710554	-0.238512575	0.971139409
2018	Kokoalongo	Squirrel	2.399905531	-1.600052578	2.094301385	1.988706976	0.17117706	0.985240283
2018	Ekalakala	Anomalure	-0.453475999	0.291317564	-0.183372011	0.108359034	0.204966114	0.97876907
2018	Ekalakala	Anomalure	-0.453475999	-0.532437691	-0.75279036	-0.643780143	0.369483683	0.929237218
2018	Kokoalongo	Duiker	0.102377546	-1.287857976	0.386046338	-0.267710554	0.899296192	0.437340096
2018	Kokoalongo	Squirrel	-0.675817417	-0.80970328	-0.183372011	0.484428622	0.945320047	0.326144154
2018	Kokoalongo	Squirrel	2.066393404	-0.935593064	-0.183372011	-0.643780143	0.997249521	0.074117425
2018	Ekalakala	Anomalure	-0.194077678	0.06051493	0.386046338	-0.643780143	0.706726556	-0.707486802
2018	Ekalakala	Anomalure	-0.824045029	-0.229574467	-0.183372011	-1.395919319	-0.092331334	-0.995728339
2018	Ekalakala	Anomalure	0.880572508	0.101540678	-0.183372011	-0.267710554	-0.783933817	-0.620844402
2018	Ekalakala	Anomalure	0.695287993	-0.356172403	-1.322208708	0.108359034	-0.861692816	-0.507430281
2018	Ekalakala	Anomalure	-0.119963872	-0.499356651	-0.183372011	-0.267710554	-0.962067572	0.272811264
2018	Ekalakala	Squirrel	0.361775866	0.053902051	0.386046338	-0.267710554	-0.901168697	0.433468545
2018	Ekalakala	Anomalure	0.435889672	-1.742154325	2.663719734	2.364776564	-0.771772737	0.635898453
2018	Kokoalongo	Duiker	0.250605158	-1.044672063	0.955464687	0.860498211	-0.677239938	0.735762235
2019	Ekalakala	Anomalure	-0.898158835	0.581626987	-0.183372011	0.484428622	0.489723078	0.871878034
2019	Ekalakala	Duiker	0.102377546	0.689246919	-0.183372011	0.108359034	0.955346162	-0.295488934
2019	Kokoalongo	Squirrel	2.177564113	-0.756809571	-0.183372011	-0.643780143	-0.29034898	-0.956920827
2019	Kokoalongo	Squirrel	-1.379898574	-0.117619443	-0.75279036	-0.267710554	-0.371480969	-0.928440569
2019	Kokoalongo	Squirrel	-0.601703611	-2.667323538	-1.322208708	-1.771988908	-0.449866405	-0.893095862
2019	Kokoalongo	Anomalure	-1.342841671	-1.216121039	-0.183372011	-0.267710554	-0.449866405	-0.893095862
2019	Kokoalongo	Anomalure	0.695287993	0.147715188	-0.75279036	-1.395919319	-0.524925742	-0.851148028
2019	Ekalakala	Anomalure	0.547060381	0.050494891	-1.322208708	0.108359034	-0.662875003	-0.748730079
2019	Kokoalongo	Squirrel	-0.638760514	-1.151046844	1.524883036	1.236567799	-0.688237584	-0.725485374
2019	Ekalakala	Anomalure	-0.490532902	0.242421814	-0.75279036	0.108359034	-0.850583162	-0.525840551
2019	Ekalakala	Anomalure	-0.379362193	0.211164502	0.386046338	-0.643780143	-0.859502597	-0.511131378
2019	Kokoalongo	Duiker	0.917629411	-0.671923145	-0.183372011	-1.019849731	-0.961478722	-0.274879369
2019	Kokoalongo	Squirrel	-0.972272641	-1.02407056	0.955464687	1.612637387	-0.99314093	0.116923448
2019	Ekalakala	Anomalure	0.398832769	0.627826817	-0.183372011	0.108359034	-0.377462484	0.926024877
2020	Kokoalongo	Duiker	0.621174187	0.144282627	-1.322208708	-1.019849731	0.485968957	0.873976071
