# Supplementary material for: Behavioural diversity of bonobo prey preference as a potential cultural trait
Source: eLife. 2020 Sep 1;9:e59191. doi: 10.7554/eLife.59191 (PMC7462605; doi:10.7554/eLife.59191)
Supplement: Supplementary file 2. [file elife-59191-supp2.docx]

**Supplementary File 2**. Demography of the adult individuals of the Ekalakala and Kokoalongo groups, 2016-2020 (M = male, F = Female).

| Subject | Group | Sex | Age (yrs) |
| --- | --- | --- | --- |
| Azur | Ekalakala | F | 15-25 |
| Bleue | F | >35 |
| Eben | F | 10-15 |
| Gris | M | 15-25 |
| Ivoire | F | 25-35 |
| Peche | F | 15-25 |
| Noir | M | 15-25 |
| Olive | F | 10-15 |
| Rose | F | 10-15 |
| Rouge | M | >35 |
| Violette | F | 25-35 |
| Adele | Kokoalongo | F | 25-35 |
| Bowie | M | 15-25 |
| Chapman | F | 25-35 |
| Dion | F | >35 |
| Elliot | F | 15-25 |
| Fito | M | 10-15 |
| Fitz | F | 25-35 |
| Gloria | F | 25-35 |
| Hendrix | M | 15-25 |
| Izia | F | 25-35 |
| Jackson | M | >35 |
| Kidjo | F | 15-25 |
| Love | F | >35 |
| Madonna | F | >35 |
| Marley | M | 25-35 |
| Oliday | F | 15-25 |
| PapaWemba | M | 15-25 |
| PJ | F | 15-25 |
| Presley | M | 10-15 |
| Nico | F | 10-15 |
| Ray | M | 25-35 |
| Simone | F | >35 |
| Sting | M | >35 |
| Tyler | F | 25-35 |
| Zappa | M | 10-15 |
| Wonder | M | 15-25 |
